# Supplementary material
Source: Springer Nature journal article supplement (https://www.springermedizin.de/resource/supplementary/12974_2011_473_MOESM2_ESM.pdf/9601366)

# Effect of human cytokines on mouse brain endothelial and human astrocyte co-culture barrier

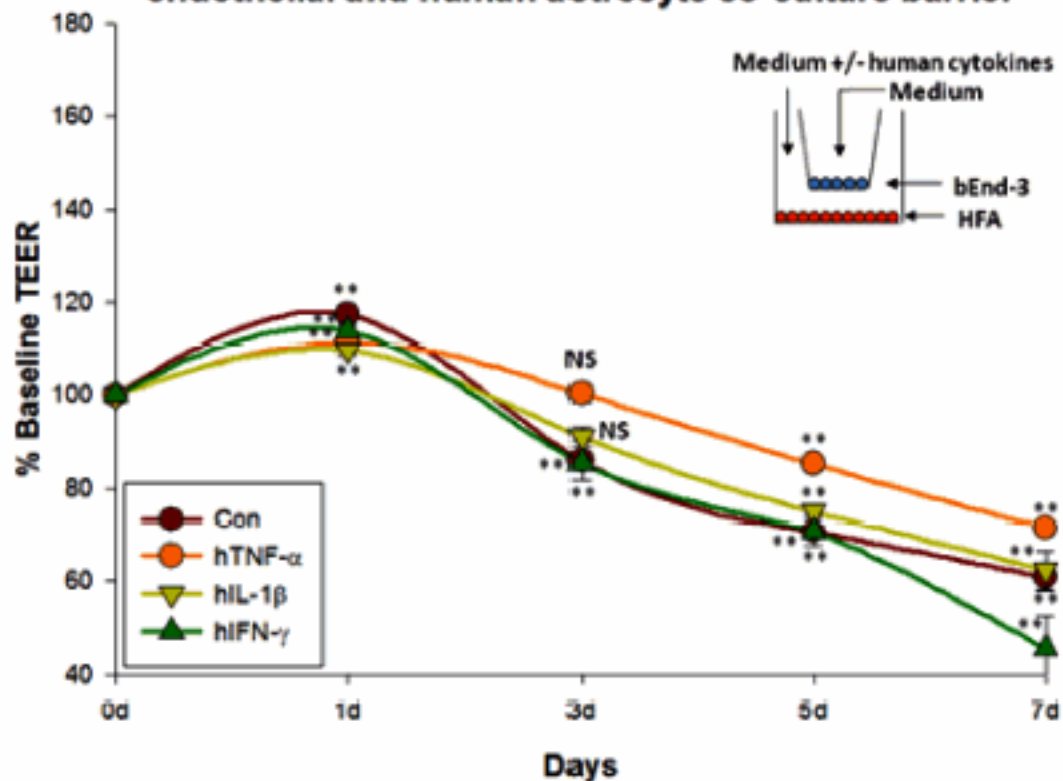

Supplement: MOESM2 [file 9601366]
